# Supplementary material
Source: PubMed Central journal article supplement (PMC4512165)
Supplement: NIHMS584522-supplement-01.pdf [file NIHMS584522-supplement-01.pdf]

## Supplementary webappendix

This webappendix formed part of the original submission and has been peer reviewed. We post it as supplied by the authors.

Supplement to: Miller WC, Powers KA, Smith MK, Cohen MS. Community viral load as a measure for assessment of HIV treatment as prevention. *Lancet Infect Dis* 2013; published online March 25. [http://dx.doi.org/10.1016/S1473-3099\(12\)70314-6](http://dx.doi.org/10.1016/S1473-3099(12)70314-6).

## Web Extra Material for Community Viral Load as a Metric for HIV Treatment as Prevention: A Cautionary Note

Miller WC, Powers KA, Smith MK, Cohen MS

Table 1 provides the values for the proportions of HIV-infected persons and the viral loads in each sub-group assumed in the calculations for Figure 3 in the main text.

**Table 1. Values used in calculations for Figure 3 of main text**

|                                                        | “Typical” US setting | “Best case”** | Explanation / Sources                                                                                                                                                                                                                                                                                                                                                                      |
|--------------------------------------------------------|----------------------|---------------|--------------------------------------------------------------------------------------------------------------------------------------------------------------------------------------------------------------------------------------------------------------------------------------------------------------------------------------------------------------------------------------------|
| <b>% HIV-infected population in each sub-group:</b>    |                      |               |                                                                                                                                                                                                                                                                                                                                                                                            |
| Infection-unaware with AHI                             | 1.0                  | 1.0           | Best case: 19% of HIV-infected are unaware of infection (midpoint of estimates from 2005 and 2008 in <sup>1</sup> )<br><br>Typical US setting: 21% of HIV infected are unaware of infection <sup>2</sup><br><br>Both settings: 4.65% of infection-unaware cases have AHI (midpoint of estimated proportions of newly diagnosed cases who have acute HIV in <sup>3</sup> and <sup>4</sup> ) |
| Infection-unaware with EHI                             |                      |               |                                                                                                                                                                                                                                                                                                                                                                                            |
|                                                        | 20.0                 | 18.0          |                                                                                                                                                                                                                                                                                                                                                                                            |
| Infection-aware, not in care                           | 39.5                 | 30.0          | Typical US setting: Fig 2 of <sup>2</sup><br>Best case: Table 1 of <sup>1</sup>                                                                                                                                                                                                                                                                                                            |
| Infection-aware, in care                               | 39.5                 | 51.0          | Typical US setting: Fig 2 of <sup>2</sup><br>Best case: Table 1 of <sup>1</sup>                                                                                                                                                                                                                                                                                                            |
| <b>Mean viral loads in each sub-group (copies/ml):</b> |                      |               |                                                                                                                                                                                                                                                                                                                                                                                            |
| Infection-unaware with AHI                             | 177,828              | 177,828       | Midpoint of mean in <sup>5</sup> and median in <sup>3</sup>                                                                                                                                                                                                                                                                                                                                |
| Infection-unaware with EHI                             | 36,992               | 36,992        | Assumed to be same as in infection-aware, not in care                                                                                                                                                                                                                                                                                                                                      |
| Infection-aware, not in care                           | 36,992               | 36,992        | Table 1 of <sup>1</sup>                                                                                                                                                                                                                                                                                                                                                                    |
| Infection-aware, in care                               | 15,314               | 15,314        | Table 1 of <sup>1</sup>                                                                                                                                                                                                                                                                                                                                                                    |

\* Based on data availability in San Francisco

The general approach to calculating each value shown in Figure 3, using the values from Table 1 above, was as follows:

$$\text{Estimated viral load measure in given setting} = \sum_{i=1}^4 \delta_i p_i v_i,$$

where

$i=1$  for those who are infection-unaware with acute HIV infection (AHI),  $i=2$  for those who are infection-unaware with established (post-acute) HIV infection (EHI),  $i=3$  for those who are infection-aware but not in care,  $i=4$  for those who are infection-aware and in care;

$\delta_i = 0$  if subgroup  $i$  does not contribute to a given measure and  $\delta_i = 1$  if subgroup  $i$  does contribute to a given measure;

$p_i = 0$  if  $\delta_i = 0$  and  $p_i =$  the proportion of all those contributing to a measure who are in subgroup  $i$  if  $\delta_i = 1$ ;

$v_i =$  the mean viral load in subgroup  $i$ .

Thus, the estimated “true” population viral load in a typical US setting (white bar in Figure 3) was calculated as:

$$(1 \times 0.01 \times 177,828) + (1 \times 0.2 \times 36,992) + (1 \times 0.395 \times 36,992) + (1 \times 0.395 \times 15,314) = 29,838 \text{ copies/ml}$$

The estimated “true” population viral load in an “ideal” setting (white bar in Figure 3, based on San Francisco data<sup>1</sup>) was calculated as:

$$(1 \times 0.01 \times 177,828) + (1 \times 0.18 \times 36,992) + (1 \times 0.30 \times 36,992) + (1 \times 0.51 \times 15,314) = 27,345 \text{ copies/ml}$$

The estimated mean viral load for settings with viral load data available only for persons in care (gray bar in Figure 3) was calculated as:

$$(0 \times 0 \times 177,828) + (0 \times 0 \times 36,992) + (0 \times 0 \times 36,992) + (1 \times 1 \times 15,314) = 15,314 \text{ copies/ml}$$

The estimated mean viral load for persons in and out of care, excluding undiagnosed, as measured in an ideal setting (black bar in Figure 3) was calculated as:

$$(0 \times 0 \times 177,828) + (0 \times 0 \times 36,992) + (1 \times 0.37 \times 36,992) + (1 \times 0.63 \times 15,314) = 23,348 \text{ copies/ml}$$

## References

1. Das M, Chu PL, Santos GM, et al. Decreases in community viral load are accompanied by reductions in new HIV infections in San Francisco. *PLoS ONE*. 2010;5(6):e11068.
2. Gardner EM, McLees MP, Steiner JF, Del Rio C, Burman WJ. The spectrum of engagement in HIV care and its relevance to test-and-treat strategies for prevention of HIV infection. *Clin Infect Dis*. Mar 15 2011;52(6):793-800.
3. Pilcher CD, Fiscus SA, Nguyen TQ, et al. Detection of acute infections during HIV testing in North Carolina. *The New England journal of medicine*. May 5 2005;352(18):1873-1883.
4. Priddy FH, Pilcher CD, Moore RH, et al. Detection of acute HIV infections in an urban HIV counseling and testing population in the United States. *J Acquir Immune Defic Syndr*. Feb 1 2007;44(2):196-202
5. Kelley CF, Barbour JD, Hecht FM. The relation between symptoms, viral load, and viral load set point in primary HIV infection. *J Acquir Immune Defic Syndr*. Aug 1 2007;45(4):445-448
